# Supplementary material
Source: Springer Nature journal article supplement (https://www.springermedizin.de/resource/supplementary/12888_2013_1854_MOESM1_ESM.pdf/9480284)
Supplement: MOESM1 [file 9480284]

# Enrollment

Care coordinators Assessed for eligibility (n= )

Excluded (n= )

- ◆ Declined to participate (n= )

Care coordinators consented (n= )

Patients Assessed for eligibility (n= )

Excluded (n= )

- ◆ Not meeting inclusion criteria (n= )
- ◆ Declined to participate (n= )

Care coordinators Randomised (n= )

# Allocation

Allocated to intervention plus TAU (

Number of care coordinators

Number of patients

Allocated to TAU (n= )

Number of care coordinators

Number of patients

# Follow-Up 12 months

Lost to follow-up (give reasons)

Number of care coordinators

Lost to follow-up (give reasons)

Number of care coordinators

# Follow-Up 15 months

Lost to follow-up (give reasons)

Number of care coordinators

Lost to follow-up (give reasons)

Number of care coordinators

# Analysis

Analysed (n= )

- ◆ Excluded from analysis (give reasons) (n= )

Analysed (n= )

- ◆ Excluded from analysis (give reasons) (n= )
